# Supplementary material for: Impact of Systemic Delays for Patient Access to Oncology Drugs on Clinical, Economic, and Quality of Life Outcomes in Canada: A Call to Action
Source: MDPI journal article supplement (doi:10.3390/curroncol31030110), 2024-03-11
Supplement: s1 [file s1]

## Bibliographic Search Strategies

PubMed (Date of search: July 21, 2022)

**Table S1: Clinical Search Strategy**

| #                                                        | Query                                                                                                                                                                                                                                                       | Results from 21 Jul 2022 |
|----------------------------------------------------------|-------------------------------------------------------------------------------------------------------------------------------------------------------------------------------------------------------------------------------------------------------------|--------------------------|
| <b>Ovid MEDLINE(R) ALL &lt;1946 to July 21, 2022&gt;</b> |                                                                                                                                                                                                                                                             |                          |
| 1                                                        | cancer*.ab,ti.                                                                                                                                                                                                                                              | 2,074,376                |
| 2                                                        | Neoplasms/                                                                                                                                                                                                                                                  | 479,846                  |
| 3                                                        | 1 or 2                                                                                                                                                                                                                                                      | 2,267,933                |
| 4                                                        | Time-to-Treatment/ or treatment delay.ab,ti.                                                                                                                                                                                                                | 11,403                   |
| 5                                                        | life year* lost.mp.                                                                                                                                                                                                                                         | 590                      |
| 7                                                        | 4 or 5                                                                                                                                                                                                                                                      | 11,988                   |
| 8                                                        | Disease-Free Survival/ or Survival/ or Progression-Free Survival/                                                                                                                                                                                           | 92,716                   |
| 9                                                        | mortality*.ab,ti.                                                                                                                                                                                                                                           | 905,477                  |
| 10                                                       | 8 or 9                                                                                                                                                                                                                                                      | 989,072                  |
| 11                                                       | 3 and 7 and 10                                                                                                                                                                                                                                              | 452                      |
| 12                                                       | limit 11 to yr="2017 -Current"                                                                                                                                                                                                                              | 284                      |
| 13                                                       | limit 12 to (editorial or letter or case report or case review or opinion) [Limit not valid in Ovid MEDLINE(R),Ovid MEDLINE(R) Daily Update,Ovid MEDLINE(R) PubMed not MEDLINE,Ovid MEDLINE(R) In-Process,Ovid MEDLINE(R) Publisher; records were retained] | 3                        |
| 14                                                       | 12 not 13                                                                                                                                                                                                                                                   | 281                      |
| 15                                                       | limit 14 to (abstracts and humans)                                                                                                                                                                                                                          | <b>264</b>               |
| <b>Pubmed (2021-2022)</b>                                |                                                                                                                                                                                                                                                             |                          |
| 1                                                        | (treatment delay) AND (cancer) AND (clinical impact)                                                                                                                                                                                                        | <b>289</b>               |

**Table S2: Economic Search Strategy**

| #                                                        | Query                                                                                                                                                                                                                                                      | Results from 25 Jul 2022 |
|----------------------------------------------------------|------------------------------------------------------------------------------------------------------------------------------------------------------------------------------------------------------------------------------------------------------------|--------------------------|
| <b>Ovid MEDLINE(R) ALL &lt;1946 to July 21, 2022&gt;</b> |                                                                                                                                                                                                                                                            |                          |
| 1                                                        | cancer*.ab,ti.                                                                                                                                                                                                                                             | 2,075,532                |
| 2                                                        | Neoplasms/                                                                                                                                                                                                                                                 | 480,043                  |
| 3                                                        | 1 or 2                                                                                                                                                                                                                                                     | 2,269,127                |
| 4                                                        | Time-to-Treatment/ or Time Factors/                                                                                                                                                                                                                        | 1,235,064                |
| 5                                                        | Economics/ or Quality-Adjusted Life Years/                                                                                                                                                                                                                 | 42,472                   |
| 6                                                        | Health Care Costs/ or "Costs and Cost Analysis"/                                                                                                                                                                                                           | 92,261                   |
| 7                                                        | 5 or 6                                                                                                                                                                                                                                                     | 131,510                  |
| 8                                                        | 3 and 4 and 7                                                                                                                                                                                                                                              | 514                      |
| 9                                                        | limit 8 to yr="2017-Current"                                                                                                                                                                                                                               | 142                      |
| 10                                                       | limit 9 to (editorial or letter or case report or case review or opinion) [Limit not valid in Ovid MEDLINE(R),Ovid MEDLINE(R) Daily Update,Ovid MEDLINE(R) PubMed not MEDLINE,Ovid MEDLINE(R) In-Process,Ovid MEDLINE(R) Publisher; records were retained] | 2                        |
| 11                                                       | 9 not 10                                                                                                                                                                                                                                                   | <b>140</b>               |
| <b>Pubmed (2021-2022)</b>                                |                                                                                                                                                                                                                                                            |                          |
| 1                                                        | ((treatment delay) OR (drug delay)) AND (cancer) AND ((economic impact) OR (economic burden))                                                                                                                                                              | <b>72</b>                |

**Table S3: Quality of Life Search Strategy**

| #                                                        | Query                                                                                                                                                                                                                                                      | Results from 25 Jul 2022 |
|----------------------------------------------------------|------------------------------------------------------------------------------------------------------------------------------------------------------------------------------------------------------------------------------------------------------------|--------------------------|
| <b>Ovid MEDLINE(R) ALL &lt;1946 to July 21, 2022&gt;</b> |                                                                                                                                                                                                                                                            |                          |
| 1                                                        | cancer*.ab,ti.                                                                                                                                                                                                                                             | 2,075,532                |
| 2                                                        | Neoplasms/                                                                                                                                                                                                                                                 | 480,043                  |
| 3                                                        | 1 or 2                                                                                                                                                                                                                                                     | 2,269,127                |
| 4                                                        | Time-to-Treatment/ or treatment delay.mp.                                                                                                                                                                                                                  | 11,505                   |
| 5                                                        | Drug Approval/ or delay* access.ab,ti.                                                                                                                                                                                                                     | 16,991                   |
| 6                                                        | 4 or 5                                                                                                                                                                                                                                                     | 28,468                   |
| 7                                                        | Quality of Life/                                                                                                                                                                                                                                           | 248,211                  |
| 8                                                        | 3 and 6 and 7                                                                                                                                                                                                                                              | 111                      |
| 9                                                        | limit 8 to yr="2017 -Current"                                                                                                                                                                                                                              | 61                       |
| 10                                                       | limit 9 to (editorial or letter or case report or case review or opinion) [Limit not valid in Ovid MEDLINE(R),Ovid MEDLINE(R) Daily Update,Ovid MEDLINE(R) PubMed not MEDLINE,Ovid MEDLINE(R) In-Process,Ovid MEDLINE(R) Publisher; records were retained] | 4                        |
| 11                                                       | 9 not 10                                                                                                                                                                                                                                                   | 57                       |
| 12                                                       | limit 11 to (abstracts and humans)                                                                                                                                                                                                                         | 55                       |
| <b>Pubmed (2021-2022)</b>                                |                                                                                                                                                                                                                                                            |                          |
| 1                                                        | (treatment delay) AND (cancer) AND (quality of life)                                                                                                                                                                                                       | 152                      |
